# Supplementary material for: A novel 3D ZnO/Cu2O nanowire photocathode material with highly efficient photoelectrocatalytic performance
Source: Royal Society of Chemistry journal article supplement (doi:10.1039/c5ta07583a), 2015-01-01
Supplement: c5ta07583a1.pdf [file c5ta07583a1.pdf]

## A novel 3D ZnO/Cu<sub>2</sub>O nanowires photocathode material with highly efficient photoelectrocatalytic performance

Jing Bai<sup>†</sup>, Yunpo Li<sup>†</sup>, Rui Wang, Ke Huang, Qingyi Zeng, Jinhua Li, and Baoxue Zhou\*

School of Environmental Science and Engineering, Shanghai Jiao Tong University, Shanghai, 200240, China

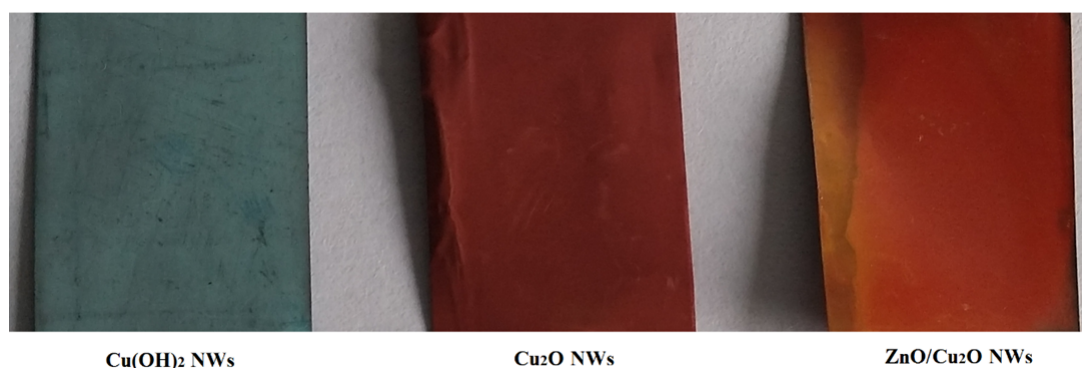

**Figure S1** Visual images of Cu(OH)<sub>2</sub> NWs electrode, Cu<sub>2</sub>O NWs electrode and 3D ZnO/Cu<sub>2</sub>O NWs electrode

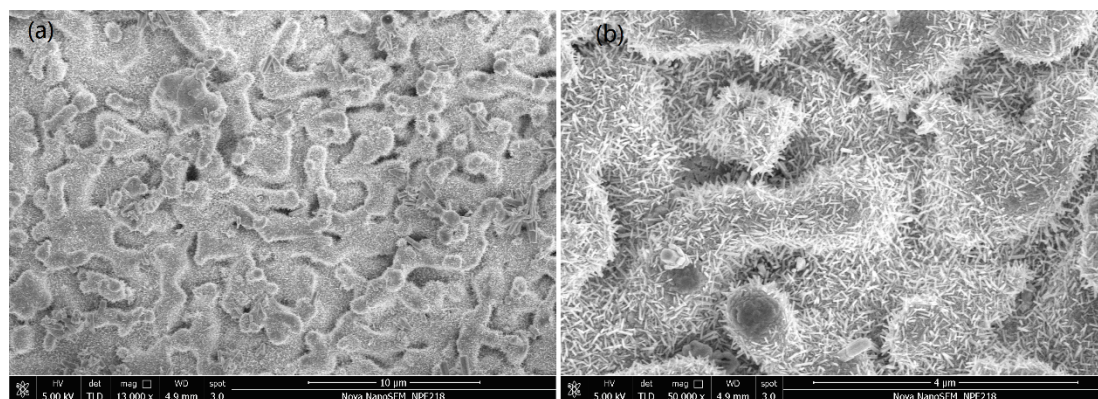

**Figure S2** SEM images of ZnO/Cu<sub>2</sub>O NWs electrode obtained at an annealing temperature of 700°C: (a) low magnification and (b) high magnification

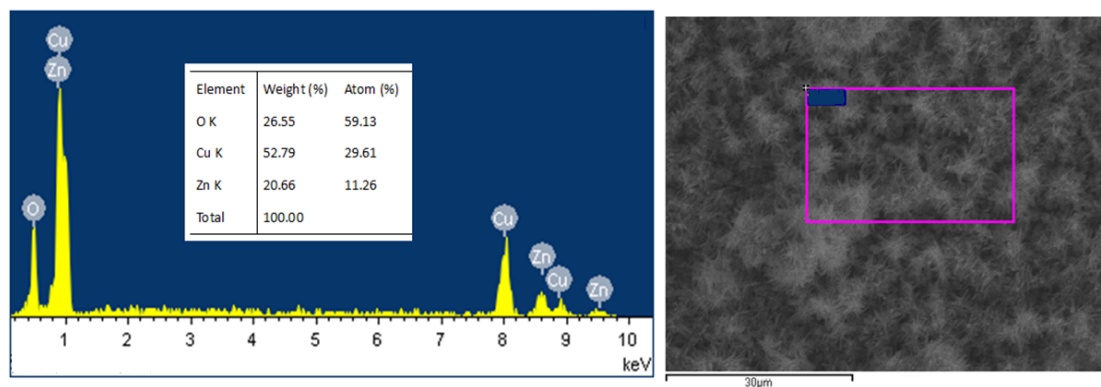

Figure S3 EDX of 3D ZnO/Cu<sub>2</sub>O NWs electrode

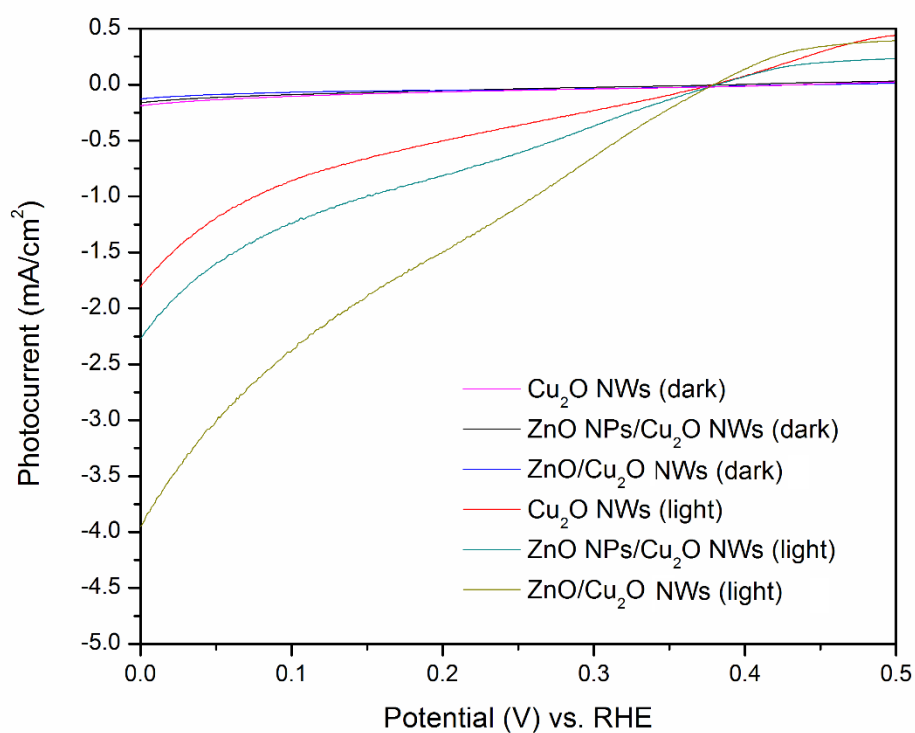

**Figure S4.** Photoelectrochemical response of pure Cu<sub>2</sub>O NWs , ZnO NPs/Cu<sub>2</sub>O NWs and (b) 3D ZnO/Cu<sub>2</sub>O NWs (1500rpm, 25 cycles, 500°C) under dark and illumination of AM 1.5G.

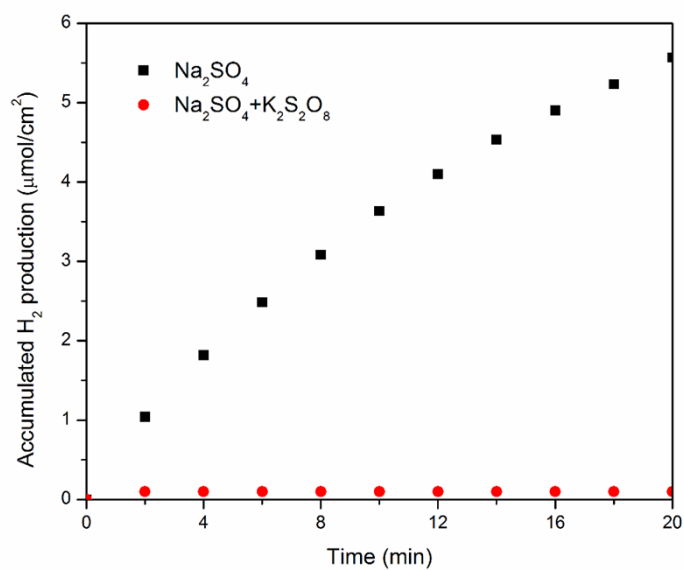

Figure S5 H<sub>2</sub> production rate with and without sacrificial electron acceptors (K<sub>2</sub>S<sub>2</sub>O<sub>8</sub>)

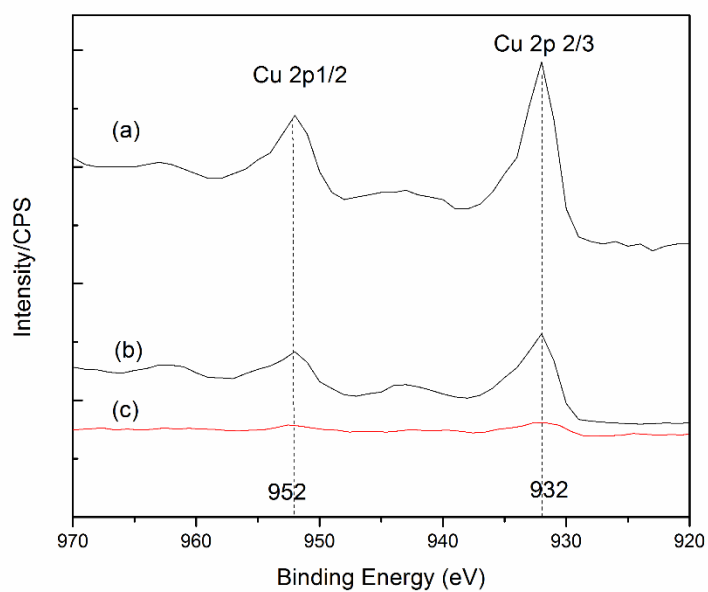

Figure S6 XPS survey of 3D ZnO/Cu<sub>2</sub>O NWs: (a) as-prepared and (b) after the 900s of stability testing and (c) Cu<sub>2</sub>O NWs after the 900s of stability testing.
